# Supplementary material for: Fungi-enabled pore channel regulation and defect engineering of a novel micro-reactor for treating complex effluents
Source: Royal Society of Chemistry journal article supplement (doi:10.1039/d2cp05608a), 2023-01-01
Supplement: d2cp05608a1.pdf [file d2cp05608a1.pdf]

1 **Supporting Information**

2 Fungi-enabled pore channel regulation and defect engineering of a novel  
3 micro-reactor for treating complex effluents.

4 Xiaoying Jiang, Yan Zhang, Feiyang Zhang, Jiashuo Tian, Liuping Zhang,

5 Xinrui Zhao Fengling Cui\*

6 College of Chemistry and Chemical Engineering, Key Laboratory of Green Chemical  
7 Media and Reactions, Ministry of Education, Henan Normal University, Xinxiang  
8 453007, China

9 **Apparatus.**

10 The X-ray diffraction pattern was collected on a X' Pert 3 Powder (XRD, PANalytical  
11 B.V., Netherlands). The samples were tested by Field emission scanning electron  
12 microscopy (FESEM, Carl Zeiss AG, Germany). The High-resolution TEM (HRTEM)  
13 images and SAED patterns were collected at a JEM 2100 transmission electron  
14 microscope (JEOL Ltd, Japan). Fourier transform infrared (FT-IR) spectra was  
15 processed by a Fourier transform infrared spectrophotometer (Bio-Rad FTS-40).  
16 Nitrogen adsorption/desorption isotherms were recorded at an ASAP 2460  
17 (Micromeritics Instruments). Vibrating sample magnetometer (VSM, Versa Lab,  
18 Quantum Design, USA), electrospray ionization mass spectrometry (ESI-MS) and X-  
19 ray photoelectron spectroscopy (XPS, Perkin Elmer Ltd, USA) were also used to  
20 gather the data.

21 **Characterization.**

---

\* Corresponding author: Tel/Fax: +86-373-3326336.  
E-mail: 562031@htu.edu.cn.

22 The FESEM and HRTEM image of RGO/Fe<sub>3</sub>O<sub>4</sub>/Ag are shown in Fig. S3. Particles  
23 with diameter of about 20 nm uniformly dispersed on gauzelike RGO nanosheets. The  
24 selected-area electron diffraction pattern (SAED) shows three significant speckles  
25 reflected by (111), (200) and (311) crystal planes (Fig. S3c), which can match with  
26 the XRD data of Ag and Fe<sub>3</sub>O<sub>4</sub>, denoting the nanocrystalline characteristics of the  
27 selected region. The HRTEM images reveal that the lattice fringes of Fe<sub>3</sub>O<sub>4</sub> and Ag  
28 nanoparticles are clearly visible across the entire nanocrystals, with the measured  
29 value of 0.210 nm and 0.200 nm corresponding to the (400) plane of Fe<sub>3</sub>O<sub>4</sub>  
30 nanoparticles and (200) plane of Ag nanoparticles respectively.

31 There are divided three peaks in the C 1s spectrum located at about 284.62 eV, 285.32  
32 eV, and 289.10 eV, which is attributed to C=C, C-N/C-O-C, C-O, the C-N/C-O-C and  
33 C-O peaks (Fig. 4b), indicating the presence of numerous functional groups that can  
34 improving the interface adsorption of nanomaterials [1,2]. It can be seen in Fe 2p XPS  
35 spectrum (Fig. 4c), there are two distinguishable peaks at 711.1 and 724.6 eV  
36 assigned to Fe 2p<sub>3/2</sub> and Fe 2p<sub>1/2</sub>, which could be deconvoluted into four characteristic  
37 peaks at about 710.5, 712.3, 723.9 and 725.7 eV attributed to the Fe (II) 2p<sub>3/2</sub>, Fe (III)  
38 2p<sub>3/2</sub>, Fe (II) 2p<sub>1/2</sub>, and Fe (III) 2p<sub>1/2</sub>. As observed from the O1s spectrum (Fig. 4d),  
39 peaks at about 531.0 and 533.0 eV in the O 1s spectra belong to the oxygen species of  
40 the PC/Fe<sub>3</sub>O<sub>4</sub>/Ag and the surface adsorbed oxygen, respectively [3]. In high-  
41 resolution Ag 3d XPS spectrum (Fig. 4e), there are two strongest characteristic peaks  
42 located at 368.3 and 374.4 eV, demonstrating the forming of Ag nanoparticles [4].  
43 Moreover, the high resolution XPS spectrum of N 1s (Fig. 4f) has four characteristic

44 peaks at 398.5 eV (pyridinic N), 400.0 eV (pyrrolic N), 401.2 eV (graphitic N) and  
45 403.5 eV (oxynitride), respectively.

## 46 **References**

- 47 [1] C. Wang, S. Yun, Q. Yang, Z. Wang, Y. Zhang, F. Han, Y. Si, and A. Hagfeldt, *J.*  
48 *Mater. Chem. A.*, 2019, **7**, 14864.
- 49 [2] Y. Wan, Y. Hu, and W. Zhou, *Sci. Total. Environ.*, 2022, **816**, 151502.
- 50 [3] L. Ni, T. Wang, K. Wang, J. Ma, Y. Wang, *Environ. Sci. Technol.*, 2022, **56**,  
51 6608-6620.
- 52 [4] T. Chen, Y. Geng, H. Wan, Y. Xu, Y. Zhou, X. Kong, J. Wang, Y. Qi, B. Yao,  
53 Z. Gao, *J. Alloys Compd.*, 2021, **876**, 160153.
