# Supplementary material for: Fungi-enabled pore channel regulation and defect engineering of a novel micro-reactor for treating complex effluents
Source: Royal Society of Chemistry journal article supplement (doi:10.1039/d2cp05608a), 2023-01-01
Supplement: d2cp05608a2.pdf [file d2cp05608a2.pdf]

### Supplementary MATLAB .figuers

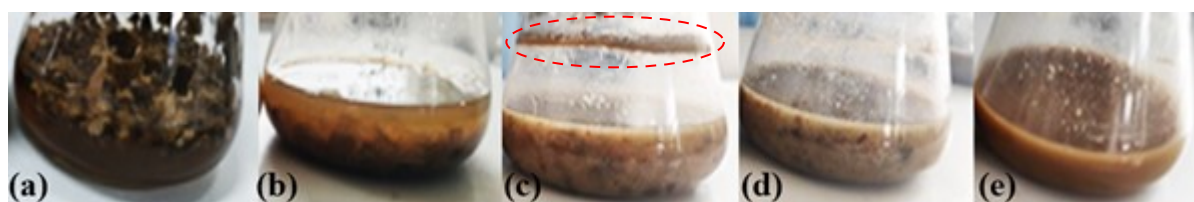

Fig. S1 Evolution of *Aspergillus Niger* hyphae grown on water hyacinth stem. Photographs of fermentation for 0 days (a), 4 days (b), 8 days (c), 12 days (d), 16 days (e), respectively.

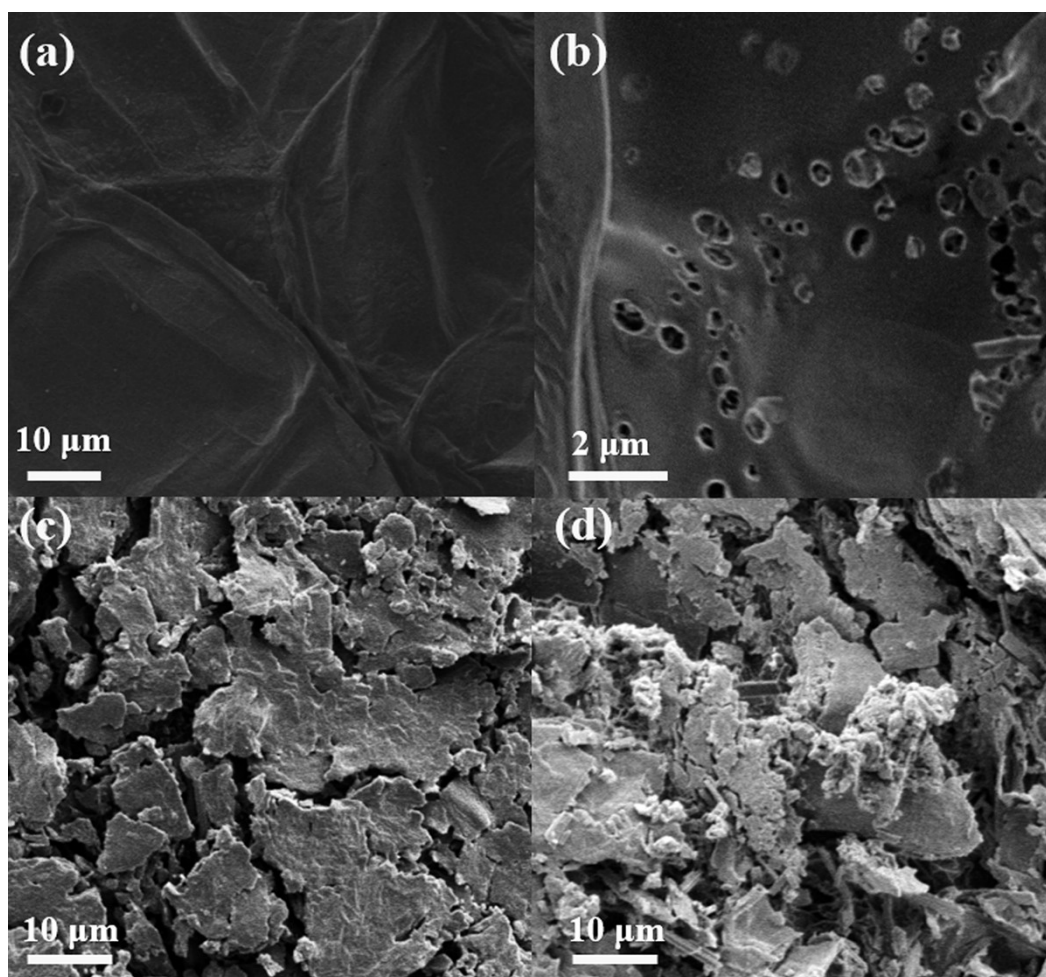

Fig. S2 SEM images of the non-inoculated PC/Fe<sub>3</sub>O<sub>4</sub>/Ag (a) and the inoculated PC/Fe<sub>3</sub>O<sub>4</sub>/Ag (b, c, d).

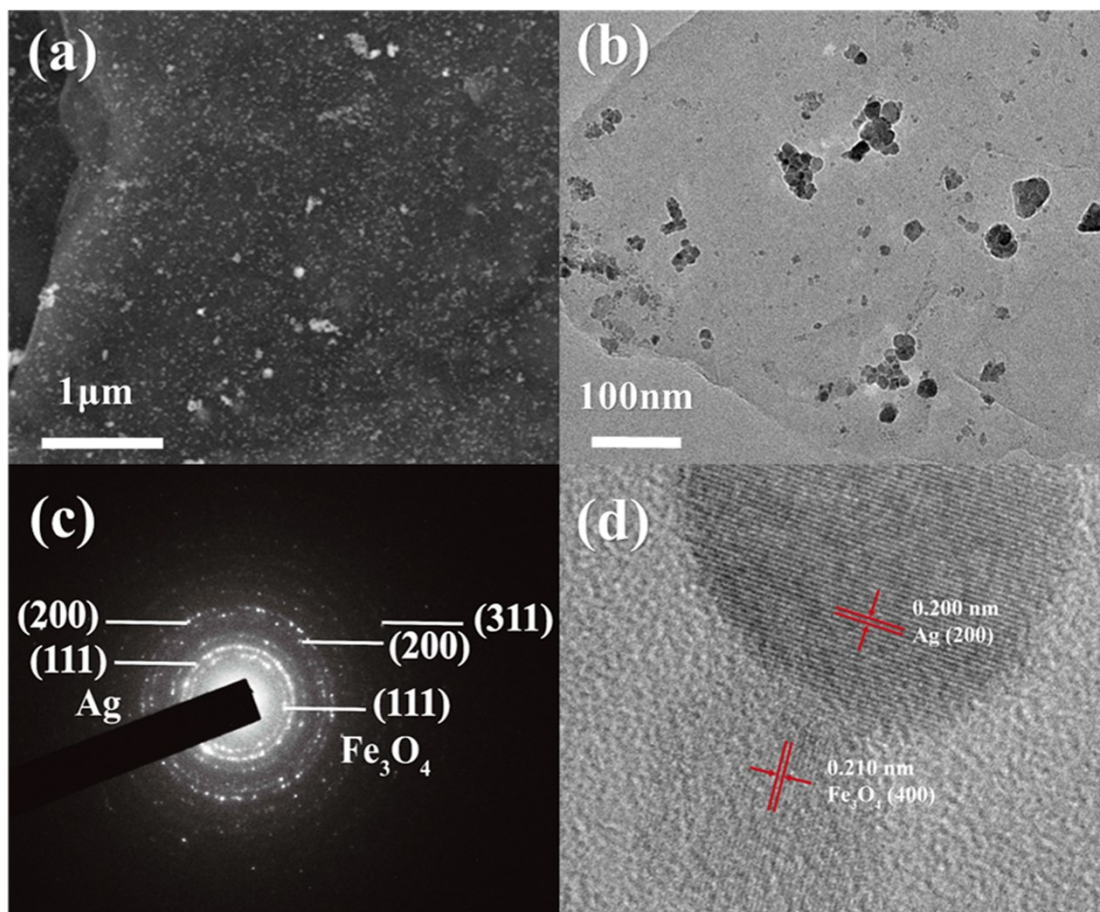

Fig. S3 (a) The FESEM image and (b, c, d) TEM image of RGO/Fe<sub>3</sub>O<sub>4</sub>/Ag (1 : 7 : 7).

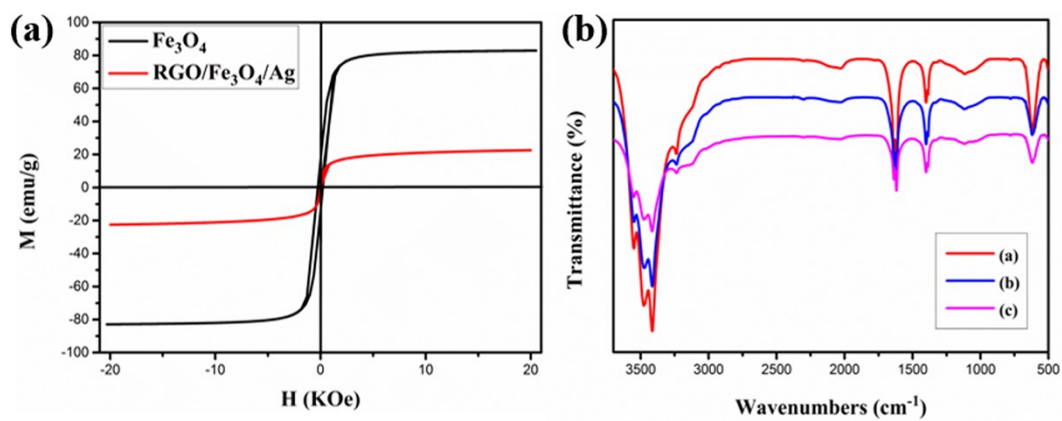

Fig. S4 (a) Plots of magnetization versus magnetic field at room temperature. (b) FT-IR of (a) RGO/Fe<sub>3</sub>O<sub>4</sub>/Ag (1:10:10) (b) RGO/Fe<sub>3</sub>O<sub>4</sub>/Ag (1:7:7) (c) RGO/Fe<sub>3</sub>O<sub>4</sub>/Ag (1:5:5).

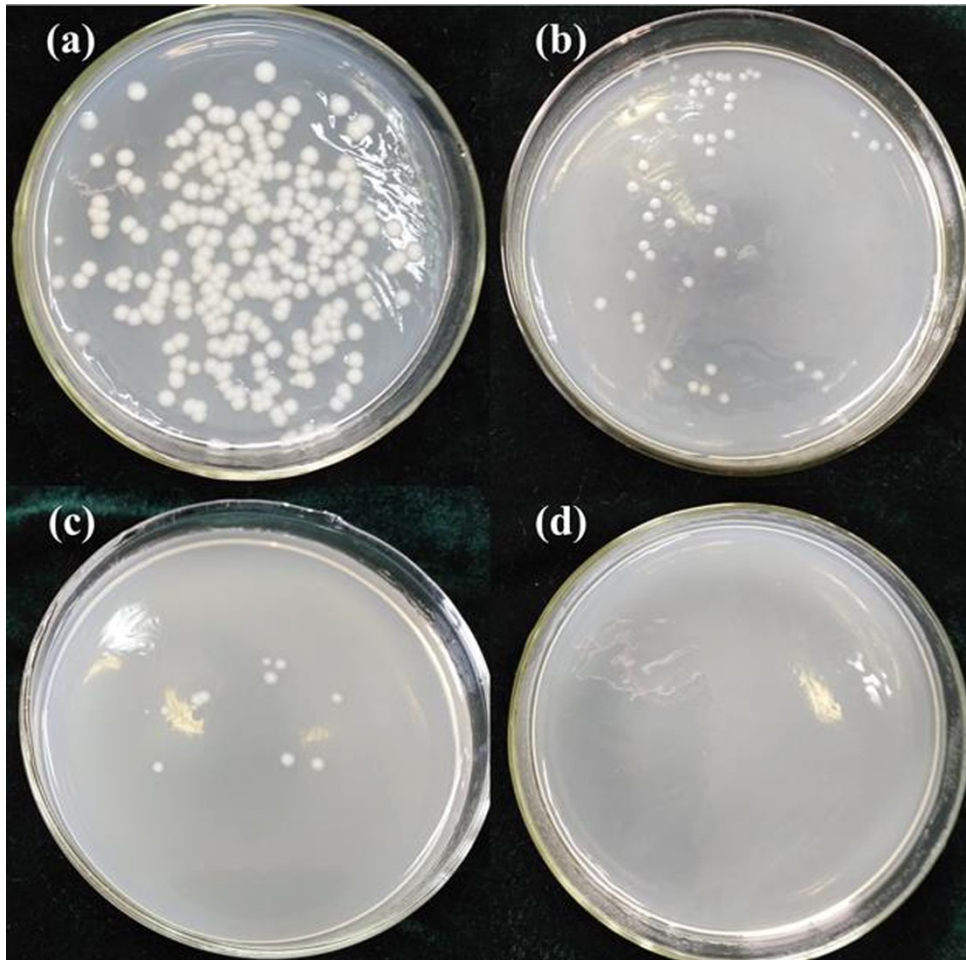

Fig. S5 The blank control group (a), 0.7 mg/mL Ag (b), 0.6 mg/mL RGO/Fe<sub>3</sub>O<sub>4</sub>/Ag (c), 0.7 mg/ml RGO/Fe<sub>3</sub>O<sub>4</sub>/ Ag (d) against *B. thuringiensis*.



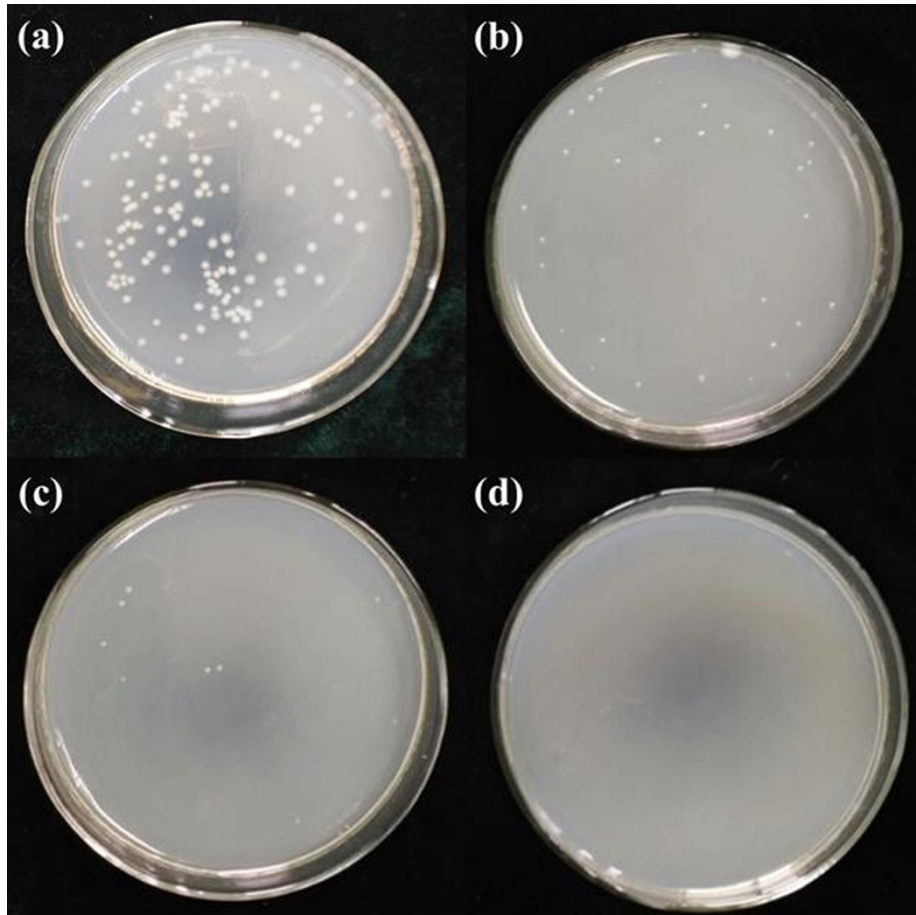

Fig. S6 The blank control group (a), 0.7 mg/mL Ag (b), 0.3 mg/mL RGO/Fe<sub>3</sub>O<sub>4</sub>/Ag (c), 0.4 mg/mL RGO/Fe<sub>3</sub>O<sub>4</sub>/Ag (d) against *E. coli*.
